# Supplementary material for: Rapid and green quantification of phloridzin and trilobatin in Lithocarpus litseifolius (Hance) Chun (sweet tea) using an online pressurized liquid extraction high-performance liquid chromatography at equal absorption wavelength method
Source: Royal Society of Chemistry journal article supplement (doi:10.1039/d4ay00170b), 2024-01-01
Supplement: d4ay00170b1.pdf [file d4ay00170b1.pdf]

## Supplementary Material

**Table S1.** Comparative analysis of peak areas for phloridzin and trilobatin at various detection wavelengths ( $n = 3$ ).

| Detection<br>Wavelength (nm) | Peak Area    |             | RSD (%)    |
|------------------------------|--------------|-------------|------------|
|                              | Phloridzin   | Trilobatin  |            |
| 289nm                        | 132 ± 0.356  | 131 ± 0.296 | 0.6        |
| 290nm                        | 126 ± 0.0200 | 125 ± 0.107 | 0.3        |
| 291nm                        | 126 ± 0.0160 | 119 ± 0.223 | 3.2        |
| RSD:                         | relative     | standard    | deviation. |

**Table S2.** Comparative analysis of peak areas for phloridzin and trilobatin at various detection bandwidths ( $n = 3$ ).

| <b>Detection<br/>Bandwidth (nm)</b> | <b>Peak Area</b>  |                   | <b>RSD (%)</b> |
|-------------------------------------|-------------------|-------------------|----------------|
|                                     | <b>Phloridzin</b> | <b>Trilobatin</b> |                |
| 1                                   | 129 ± 1.45        | 124 ± 2.19        | 2.7            |
| 2                                   | 128 ± 1.71        | 125 ± 0.398       | 1.9            |
| 4                                   | 121 ± 0.0965      | 121 ± 0.604       | 0.5            |
| 8                                   | 127 ± 0.659       | 122 ± 0.286       | 2.1            |

RSD: relative standard deviation.

**Table S3.** Recovery results of the developed method.

| Compound   | Number | Original Amount<br>(μg) | Spiked Amount<br>(μg) | Found Amount<br>(μg) | Recovery<br>(%) | Average Recovery<br>(%) | RSD<br>(%) |
|------------|--------|-------------------------|-----------------------|----------------------|-----------------|-------------------------|------------|
| Phloridzin | 1      | 0.256                   | 0.491                 | 0.723                | 95.1            | 97.9                    | 4.1        |
|            | 2      | 0.280                   | 0.491                 | 0.745                | 94.6            |                         |            |
|            | 3      | 0.273                   | 0.491                 | 0.751                | 97.3            |                         |            |
|            | 4      | 0.266                   | 0.491                 | 0.730                | 94.4            |                         |            |
|            | 5      | 0.249                   | 0.491                 | 0.756                | 103             |                         |            |
|            | 6      | 0.242                   | 0.491                 | 0.746                | 103             |                         |            |
| Trilobatin | 1      | 1.13                    | 0.995                 | 2.10                 | 97.4            | 95.3                    | 3.5        |
|            | 2      | 1.23                    | 0.995                 | 2.15                 | 91.8            |                         |            |
|            | 3      | 1.20                    | 0.995                 | 2.19                 | 98.8            |                         |            |
|            | 4      | 1.17                    | 0.995                 | 2.07                 | 90.5            |                         |            |
|            | 5      | 1.10                    | 0.995                 | 2.06                 | 96.8            |                         |            |
|            | 6      | 1.06                    | 0.995                 | 2.02                 | 96.3            |                         |            |
| RSD:       |        | relative                |                       | standard             |                 | deviation.              |            |

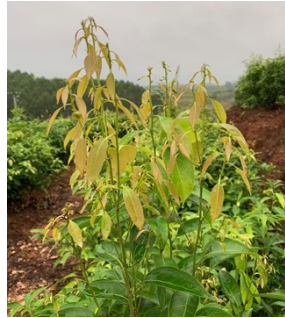

*Lithocarpus Litseifolius* (Hance) Chun

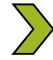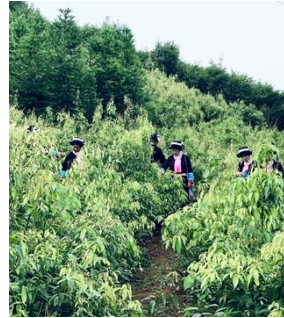

Harvest

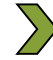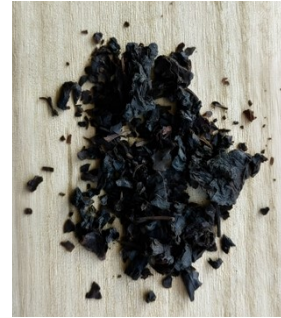

Sweet Tea

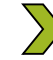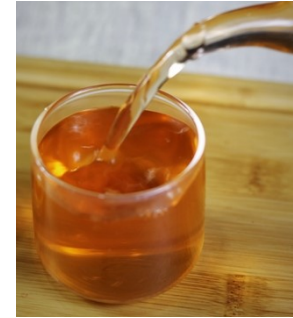

Sweet Tea Drinking

**Fig. S1.** From plant to a cup of tea: The journey of sweet tea.

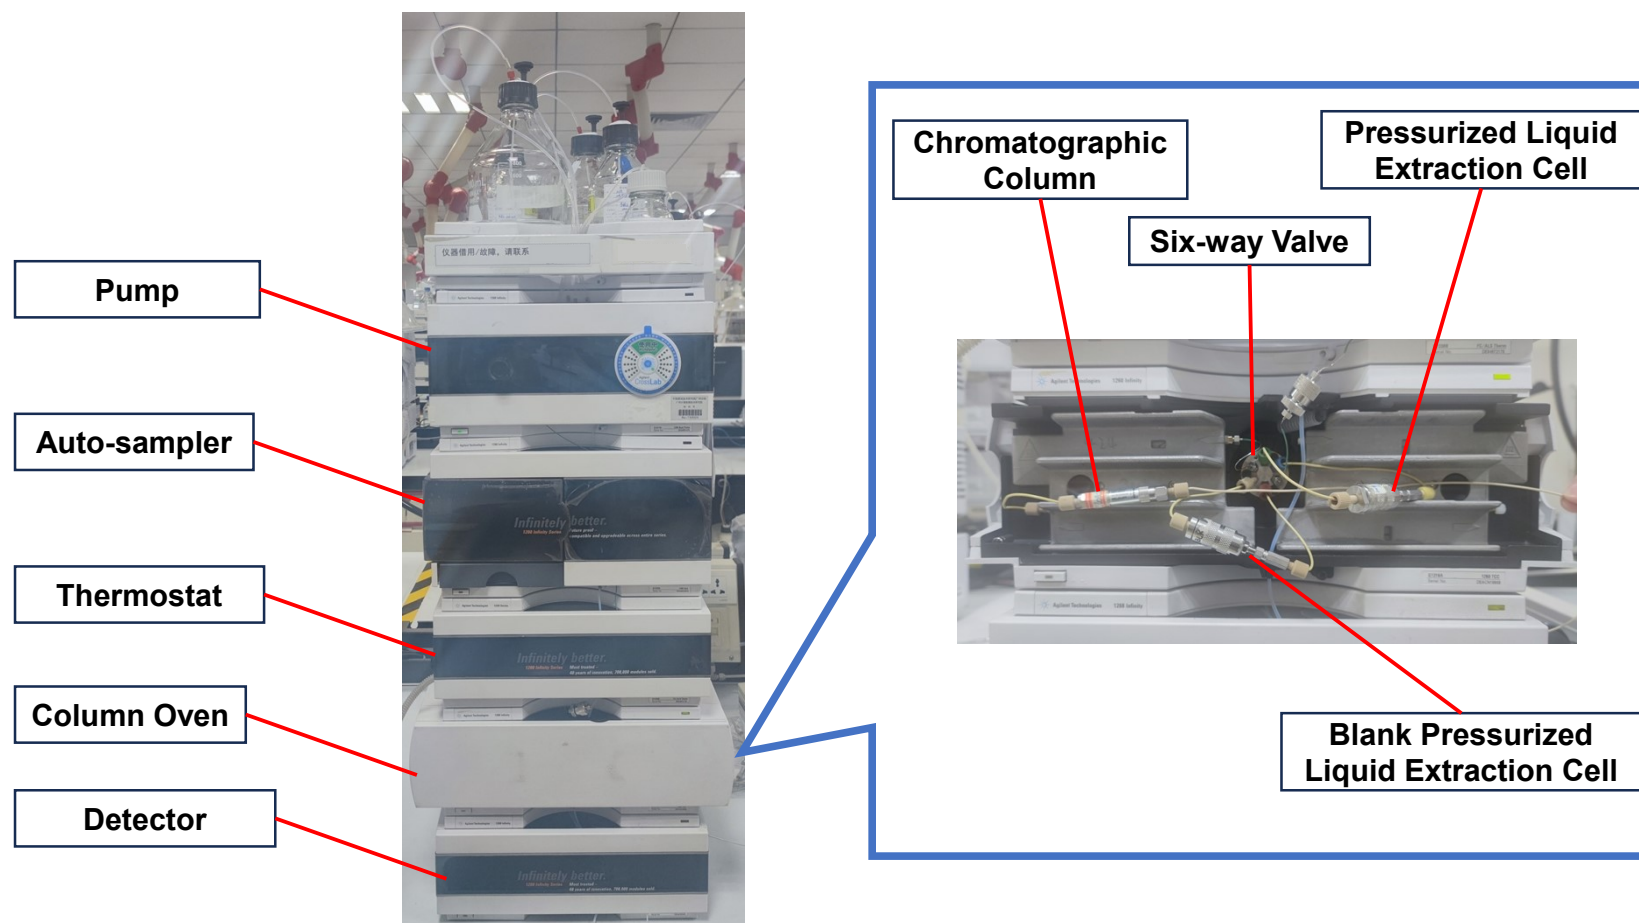

**Fig. S2.** Online pressurized liquid extraction coupled to high-performance liquid chromatography system.

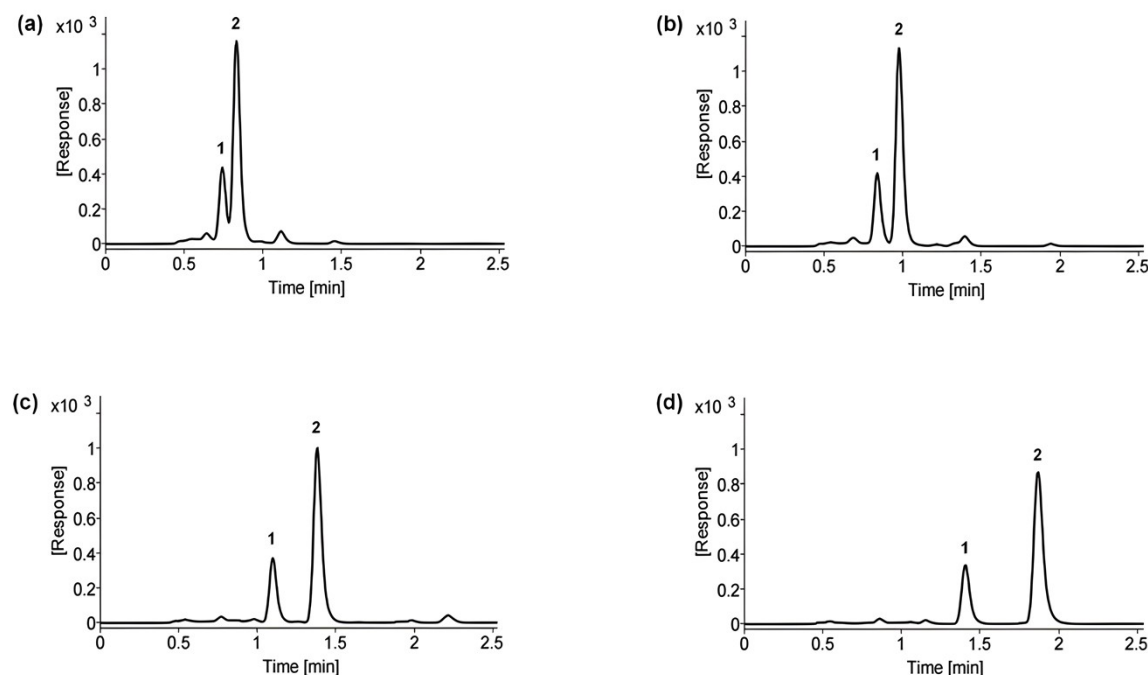

**Fig. S3.** Chromatograms of sample solution across various mobile phases: (a) 70:30; (b) 72:28; (c) 75:25; (d) 76.5:23.5. Compounds labeled: (1) Phloridzin; (2) Trilobatin. Liquid Chromatography separation conditions: Mobile phase, 0.1% aqueous formic acid (A) and acetonitrile (B) at the ratio of 76.5:23.5; column temperature, 25 °C; flow rate, 1.5 mL/min. Ultraviolet detection conditions: Detection wavelength, 290 nm.

Results and discussion: To determine the optimal mobile phase ratio, various ratios were examined, including 70:30, 72:28, 75:25, and 76.5:23.5. The results demonstrated enhanced separation and improved peak characteristics of the target compounds when employing a mobile phase ratio of 76.5:23.5. Therefore, this specific ratio was determined to be the most favorable for the mobile phase composition.

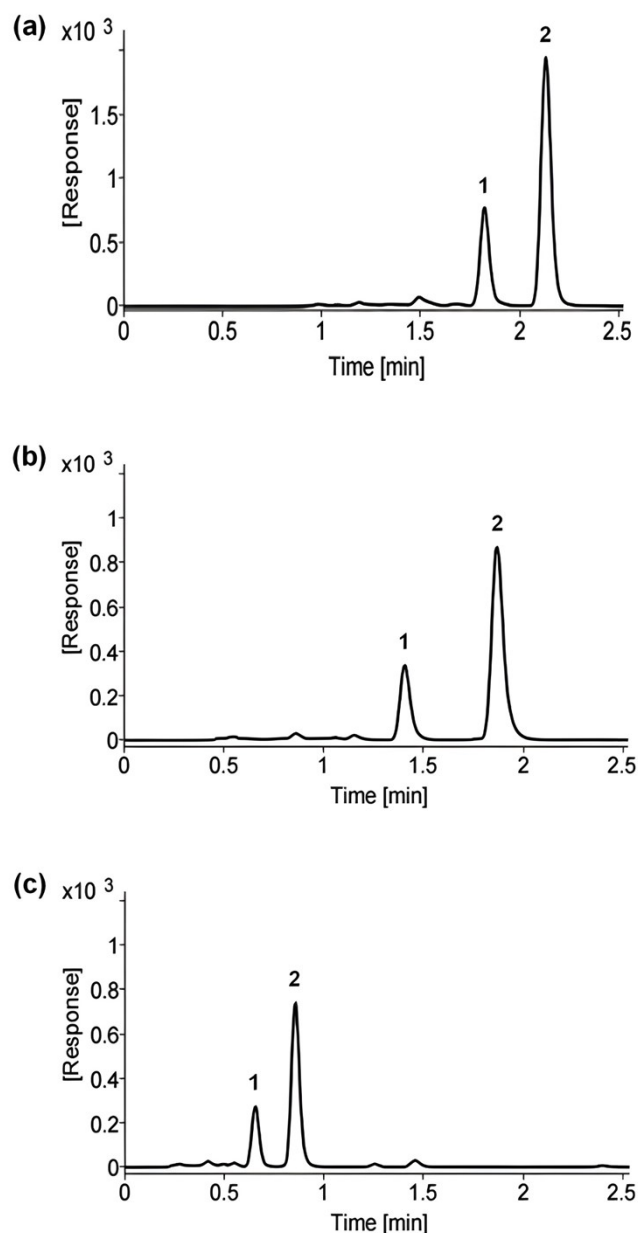

**Fig. S4.** Chromatograms of sample solutions at varying mobile phase flow rates: (a) 1 mL/min; (b) 1.5 mL/min; (c) 2.0 mL/min. Compounds labeled: (1) Phloridzin; (2) Trilobatin. Liquid Chromatography separation conditions: Mobile phase, 0.1% aqueous formic acid (A) and acetonitrile (B) at the ratio of 76.5:23.5; column temperature, 25 °C; flow rate, 1.5 mL/min. Ultraviolet detection conditions: Detection wavelength, 290 nm.

**Results and discussion:** To determine the optimal flow rate, various flow rates were examined, including 1.0 mL/min, 1.5 mL/min, and 2.0 mL/min. The results demonstrated that a flow rate of 1.5 mL/min gave a satisfied separations and peak times. Therefore, 1.5 mL/min was chosen as the flow rate.

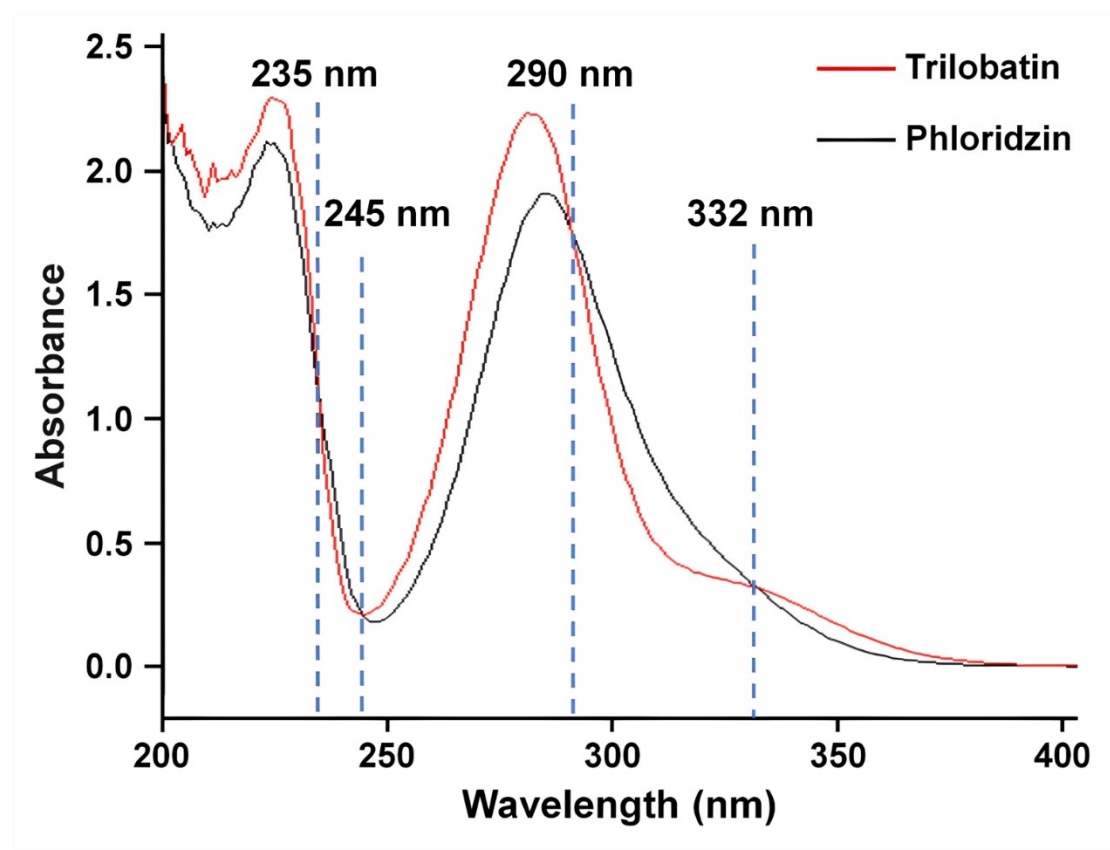

**Fig. S5.** Ultraviolet spectrograms of phloridzin and trilobatin scanned from 200 nm to 400 nm.



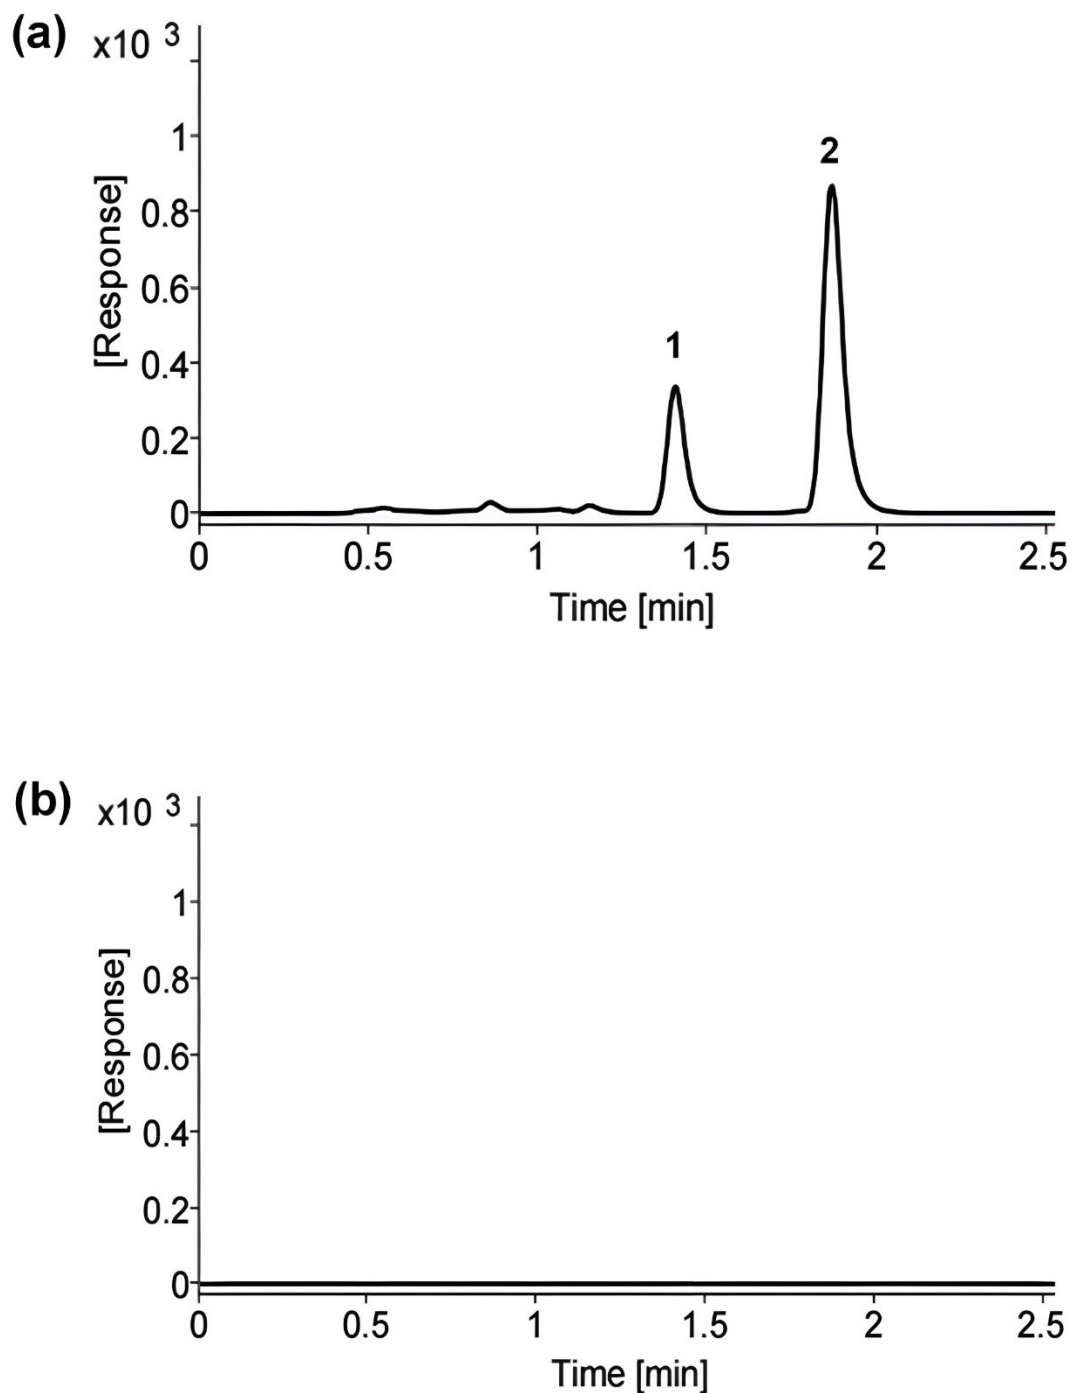

**Fig. S6.** Chromatograms of the sample after two consecutive extractions using the developed method: (a) First extraction; (b) Second extraction. Compounds labeled: (1) Phloridzin; (2) Trilobatin. Liquid Chromatography separation conditions: Mobile phase, 0.1% aqueous formic acid (A) and acetonitrile (B) at the ratio of 76.5:23.5; column temperature, 25 °C; flow rate, 1.5 mL/min. Ultraviolet detection conditions: Detection wavelength, 290 nm.
